# Supplementary material for: Photosensitizer-loaded hydrogels for photodynamic inactivation of multirestistant bacteria in wounds
Source: Royal Society of Chemistry journal article supplement (doi:10.1039/d0ra09786a), 2021-01-01
Supplement: d0ra09786a1.pdf [file d0ra09786a1.pdf]

## Photosensitizer-Loaded Hydrogels for Photodynamic Inactivation of Multiresistant Bacteria in Wounds – Supporting Information

Received 00th January 20xx,  
Accepted 00th January 20xx

DOI: 10.1039/x0xx00000x

Sarah Glass<sup>1</sup>, Mathias Kühnert<sup>1</sup>, Norman Lippmann<sup>2</sup>, Joanne Zimmer<sup>1</sup>, Robert Werdehausen<sup>3</sup>, Bernd Abel<sup>1</sup>, Volker Eulenburger<sup>3</sup>, Agnes Schulze<sup>1\*</sup>

**Table S1.** Antibiotic resistance pattern of ESBL *E. coli* Seq. no. 443733 (S(ensible)/R(esistant)/I(ntermediate)).

| Agent                   | MIC (minimal inhibitory concentration) [µg/ml] | S/R/I |
|-------------------------|------------------------------------------------|-------|
| Piperacillin            | > 128.00                                       | R     |
| Piperacillin/Tazobactam | < 4.00                                         | S     |
| Cefotaxime              | > 64.00                                        | R     |
| Ceftazidime             | 16.00                                          | R     |
| Aztreonam               | 16.00                                          | R     |
| Imipenem                | < 0.25                                         | S     |
| Meropenem               | < 0.25                                         | S     |
| Gentamicin              | < 1.00                                         | S     |
| Amikacin                | < 2.00                                         | S     |
| Trobamycin              | < 1.00                                         | S     |
| Colistin                | < 0.50                                         | S     |
| Fosfomycin              | < 16.00                                        | S     |
| Ciprofloxacin           | > 4.00                                         | R     |
| Moxifloxacin            | > 8.00                                         | R     |
| Tigercyclin             | < 0.50                                         | S     |
| Cotrimoxazol            | <20.00                                         | S     |

**Table S2.** Antibiotic resistance pattern of VRE *E. faecium* Seq. no. 432107 (S(ensible)/R(esistant)/I(ntermediate)).

| Agent         | MIC (minimal inhibitory concentration) [µg/ml] | S/R/I |
|---------------|------------------------------------------------|-------|
| E-Teicoplanin | 32.00                                          | R     |
| E-Vancomycin  | >256.00                                        | R     |

[www.rsc.org/](http://www.rsc.org/)

<sup>1</sup> Leibniz Institute of Surface Engineering (IOM), Permoserstraße 15, D-04318 Leipzig, Germany

<sup>2</sup> Institute of Medical Microbiology and Epidemiology of Infectious Diseases, University Hospital Leipzig, Liebigstraße 21, D-04103 Leipzig

<sup>3</sup> Department of Anesthesiology and Intensive Care Medicine, University Hospital Leipzig, Liebigstraße 20, D-04103 Leipzig

DOI: 10.1039/x0xx00000x

**Table S3.** Antibiotic resistance pattern of MRSA *S. aureus* Seq. no. 617953 (S(ensible)/R(esistant)/I(ntermediate)).

This jourr

| Agent                   | MIC (minimal inhibitory concentration) [µg/ml] | S/R/I |
|-------------------------|------------------------------------------------|-------|
| Penicillin G            | > 4.00                                         | R     |
| Oxacillin               | > 8.00                                         | R     |
| Ampicillin /Sulbactam   | 16                                             | R     |
| Piperacillin/Tazobactam | > 64.00                                        | R     |

**Table S5.** Antibiotic resistance pattern of *P. aeruginosa* Seq. no. 119769 (S(ensible)/R(esistant)/I(ntermediate)/\*(no sufficient data about clinical effectivity)).

| Agent                   | MIC (minimal inhibitory concentration) [ $\mu\text{g/ml}$ ] | S/R/I/* |
|-------------------------|-------------------------------------------------------------|---------|
| Ampicillin              | > 32.00                                                     | R       |
| Ampicillin /Sulbactam   | > 32.00                                                     | R       |
| Piperacillin            | > 64.00                                                     | R       |
| Piperacillin/Tazobactam | > 64.00                                                     | R       |
| Cefuroxim               | > 32.00                                                     | R       |
| Cefotaxime              | > 8.00                                                      | R       |
| Ceftazidime             | > 32.00                                                     | R       |
| Aztreonam               | > 32.00                                                     | R       |
| Imipenem                | > 16.00                                                     | R       |
| Meropenem               | 4.00                                                        | I       |
| Gentamicin              | 1.00                                                        | S       |
| Amikacin                | 1.00                                                        | S       |
| Trobamycin              | 0.25                                                        | S       |
| Colistin                | 1.00                                                        | S       |
| Fosfomycin              | 64.00                                                       | *       |
| Ciprofloxacin           | 1.00                                                        | R       |
| Levofloxacin            | 2.00                                                        | R       |
| Moxifloxacin            | 2.00                                                        | *       |
| Doxycyclin              | 8.00                                                        | R       |
| Tigercyclin             | > 4.00                                                      | *       |
| Cotrimoxazol            | 2.00                                                        | R       |
| Nitroxolin              | 16.00                                                       | *       |
| Mecillinam              | 8.00                                                        | *       |
| E-Ceftazidime/Avibactam | 2.00                                                        | S       |
| E-Ceftolozan/Tazobactam | 4.00                                                        | S       |
| Imipenem                | > 16.00                                                     | R       |
| Meropenem               | > 16.00                                                     | R       |
| Gentamicin              | > 512.00                                                    | R       |
| Amikacin                | > 64.00                                                     | R       |
| Trobamycin              | > 16.00                                                     | R       |
| Colistin                | > 8.00                                                      | *       |
| Fosfomycin              | > 128.00                                                    | *       |
| Ciprofloxacin           | > 4.00                                                      | R       |
| Levofloxacin            | 8.00                                                        | R       |
| Moxifloxacin            | 1.00                                                        | I       |
| Doxycyclin              | 1.00                                                        | *       |

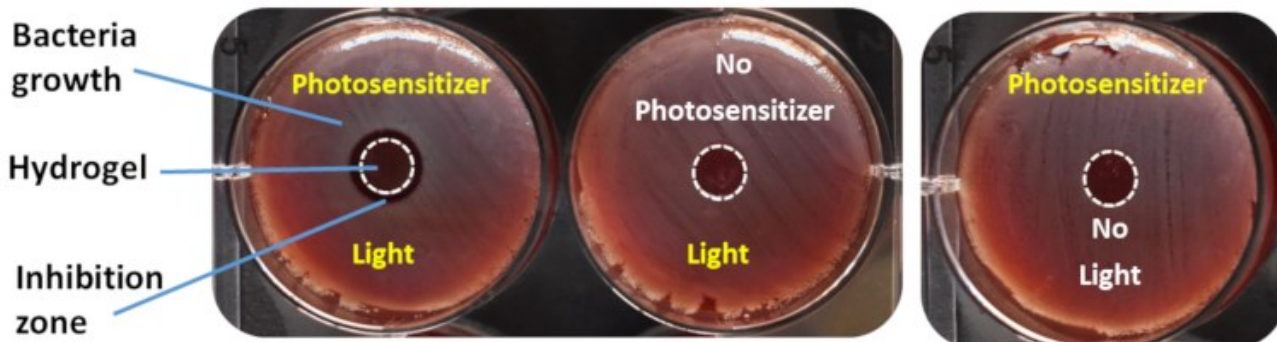**Figure S1.** : Example of loaded hydrogel samples on blood agar plates. Left: Sample loaded with photosensitizer (THPTS) + illumination. Middle: Sample without photosensitizer + illumination (light control). Right: Sample loaded with photosensitizer without illumination (dark control). Hydrogels are surrounded by white dashed circles for better visualization.

|                           |          |   |
|---------------------------|----------|---|
| E-Moxifloxacin            | > 32.00  | R |
| E-Piperacillin/Tazobactam | > 256.00 | R |
| E-Rifampicin              | > 32.00  | R |
| E-Tigercyclin             | 0.25     | S |
| E-Tobramycin              | > 256.00 | * |
